# Supplementary material
Source: PubMed Central journal article supplement (PMC6113501)
Supplement: zjm999096064s1.pdf [file zjm999096064s1.pdf]

1 **Supplementary Table 1: Gene and chromosomal mutation presence/absence as predicted by Genefinder, Mykrobe, Typewriter (n=1379)**

| Gene                        | Type (resistance gene, mutation or other) | Absence/Presence for Genefinder, MyKrobe, Typewriter |      |     |     |     |     |     | Discordant across programs (n, %) |
|-----------------------------|-------------------------------------------|------------------------------------------------------|------|-----|-----|-----|-----|-----|-----------------------------------|
|                             |                                           | AAA                                                  | PPP  | PAA | APA | PPA | PAP | APP |                                   |
| <i>aac(6')-aph(2'')</i>     | Gentamicin, gene                          | 1300                                                 | 76   | 0   | 2   | 1   | 0   | 0   | 3 (0.2%)                          |
| <i>aadD or aph(4)-Ia</i>    | Kanamycin, gene                           | 1291                                                 | 86   | 0   | 2   | 0   | 0   | 0   | 2 (0.1%)                          |
| <i>aadE or aph(6)-Ia</i>    | Streptomycin, gene                        | 1328                                                 | 21   | 0   | 28  | 2   | 0   | 0   | <b>30 (2.2%)</b>                  |
| <i>ant9-Ia</i>              | Spectinomycin, gene                       | 1227                                                 | 145  | 0   | 4   | 3   | 0   | 0   | 7 (0.5%)                          |
| <i>ant9-1b</i>              | Spectinomycin, gene                       | 1379                                                 | 0    | 0   | 0   | 0   | 0   | 0   | 0 (0.0%)                          |
| <i>aph(2'')-Ic</i>          | Gentamicin, gene                          | 1379                                                 | 0    | 0   | 0   | 0   | 0   | 0   | 0 (0.0%)                          |
| <i>aphA3 or aph(3')-III</i> | Kanamycin, gene                           | 1327                                                 | 51   | 0   | 0   | 1   | 0   | 0   | 1 (0.1%)                          |
| <i>blaZ</i>                 | Penicillin, gene                          | 222                                                  | 1130 | 0   | 19  | 7   | 0   | 1   | <b>27 (2.0%)</b>                  |
| <i>cat</i>                  | Chloramphenicol, gene                     | 1379                                                 | 0    | 0   | 0   | 0   | 0   | 0   | 0 (0.0%)                          |
| <i>cfr</i>                  | Chloramphenicol & Linezolid, gene         | 1376                                                 | 2    | 0   | 0   | 1   | 0   | 0   | 1 (0.1%)                          |
| <i>dfrA</i>                 | Trimethoprim, gene                        | 1341                                                 | 34   | 0   | 3   | 0   | 0   | 1   | 4 (0.3%)                          |
| <i>dfrC</i>                 | Trimethoprim, gene                        | 1341                                                 | 1    | 0   | 0   | 3   | 0   | 34  | <b>37 (2.7%)</b>                  |
| <i>dfrD</i>                 | Trimethoprim, gene                        | 1379                                                 | 0    | 0   | 0   | 0   | 0   | 0   | 0 (0.0%)                          |
| <i>dfrG</i>                 | Trimethoprim, gene                        | 1325                                                 | 53   | 0   | 1   | 0   | 0   | 0   | 1 (0.1%)                          |
| <i>dfrK</i>                 | Trimethoprim, gene                        | 1373                                                 | 6    | 0   | 0   | 0   | 0   | 0   | 0 (0.0%)                          |
| <i>ermA</i>                 | Erythromycin, clindamycin, gene           | 1229                                                 | 144  | 0   | 1   | 5   | 0   | 0   | 6 (0.4%)                          |
| <i>ermB</i>                 | Erythromycin, clindamycin, gene           | 1375                                                 | 3    | 0   | 1   | 0   | 0   | 0   | 1 (0.1%)                          |
| <i>ermC</i>                 | Erythromycin, clindamycin, gene           | 1191                                                 | 176  | 0   | 10  | 2   | 0   | 0   | 12 (0.9%)                         |



| Gene               | Type (resistance gene, mutation or other) | Absence/Presence for Genefinder, MyKrobe, Typewriter |       |     |     |     |     |     | Discordant across programs (n, %) |
|--------------------|-------------------------------------------|------------------------------------------------------|-------|-----|-----|-----|-----|-----|-----------------------------------|
|                    |                                           | AAA                                                  | PPP   | PAA | APA | PPA | PAP | APP |                                   |
| <i>vgbA</i>        | Lincosamide, gene                         | 1379                                                 | 0     | 0   | 0   | 0   | 0   | 0   | 0 (0.0%)                          |
| <i>dfrB</i>        | Mutations, see Supplementary Table 3*     | 1297                                                 | 81    | 0   | 0   | 0   | 1   | 0   | 1 (0.1%)                          |
| <i>fusA</i>        | Mutations, see Supplementary Table 3*     | 1320                                                 | 57    | 0   | 0   | 2   | 0   | 0   | 2 (0.1%)                          |
| <i>gria/gyrA**</i> | Mutations, see Supplementary Table 3*     | 1072                                                 | 304   | 0   | 1   | 0   | 2   | 0   | 3 (0.2%)                          |
| <i>rpoB</i>        | Mutations, see Supplementary Table 3*     | 1354                                                 | 7     | 0   | 1   | 0   | 1   | 0   | <b>2 (0.1%)</b>                   |
| <i>arcA</i>        | Virulence gene                            | 1372                                                 | 6     | 0   | 1   | 0   | 0   | 0   | 1 (0.1%)                          |
| <i>arcB</i>        | Virulence gene                            | 1373                                                 | 0     | 0   | 0   | 0   | 0   | 6   | 6 (0.4%)                          |
| <i>arcC</i>        | Virulence gene                            | 1373                                                 | 0     | 0   | 0   | 0   | 0   | 6   | 6 (0.4%)                          |
| <i>arcD</i>        | Virulence gene                            | 1373                                                 | 0     | 0   | 0   | 0   | 0   | 6   | 6 (0.4%)                          |
| <i>sak</i>         | Virulence gene                            | 306                                                  | 1,065 | 0   | 3   | 5   | 0   | 0   | 8 (0.6%)                          |
| <i>sasx</i>        | Virulence gene                            | 1364                                                 | 0     | 0   | 1   | 0   | 0   | 14  | <b>15 (1.1%)</b>                  |
| <i>chp</i>         | Virulence gene                            | 449                                                  | 883   | 0   | 1   | 46  | 0   | 0   | <b>47 (3.4%)</b>                  |
| <i>eta</i>         | Virulence gene                            | 1338                                                 | 40    | 0   | 1   | 0   | 0   | 0   | 1 (0.1%)                          |
| <i>etb</i>         | Virulence gene                            | 1372                                                 | 5     | 0   | 1   | 1   | 0   | 0   | 2 (0.1%)                          |
| <i>etd</i>         | Virulence gene                            | 1320                                                 | 57    | 0   | 1   | 1   | 0   | 0   | 2 (0.1%)                          |
| <i>lukM</i>        | Virulence gene                            | 1370                                                 | 9     | 0   | 0   | 0   | 0   | 0   | 0 (0.0%)                          |
| <i>lukF-P83</i>    | Virulence gene                            | 1370                                                 | 3     | 0   | 0   | 0   | 0   | 6   | 6 (0.4%)                          |
| <i>lukpvf</i>      | Virulence gene                            | 1266                                                 | 111   | 0   | 2   | 0   | 0   | 0   | 2 (0.1%)                          |
| <i>lukpvs</i>      | Virulence gene                            | 1266                                                 | 109   | 0   | 3   | 1   | 0   | 0   | 4 (0.3%)                          |
| <i>scn</i>         | Virulence gene                            | 144                                                  | 1,217 | 0   | 3   | 15  | 0   | 0   | <b>17 (1.2%)</b>                  |
| <i>sea</i>         | Virulence gene                            | 1080                                                 | 295   | 0   | 1   | 3   | 0   | 0   | 4 (0.3%)                          |
| <i>seb</i>         | Virulence gene                            | 1267                                                 | 109   | 0   | 1   | 2   | 0   | 0   | 3 (0.2%)                          |
| <i>sec</i>         | Virulence gene                            | 1149                                                 | 225   | 0   | 1   | 4   | 0   | 0   | 5 (0.4%)                          |
| <i>sed</i>         | Virulence gene                            | 1313                                                 | 66    | 0   | 0   | 0   | 0   | 0   | 0 (0.0%)                          |

| Gene                                   | Type (resistance gene, mutation or other) | Absence/Presence for Genefinder, MyKrobe, Typewriter |                 |               |               |               |               |               | Discordant across programs (n, %) |
|----------------------------------------|-------------------------------------------|------------------------------------------------------|-----------------|---------------|---------------|---------------|---------------|---------------|-----------------------------------|
|                                        |                                           | AAA                                                  | PPP             | PAA           | APA           | PPA           | PAP           | APP           |                                   |
| <i>see</i>                             | Virulence gene                            | 1375                                                 | 4               | 0             | 0             | 0             | 0             | 0             | 0 (0.0%)                          |
| <i>seg</i>                             | Virulence gene                            | 600                                                  | 753             | 0             | 6             | 20            | 0             | 0             | <b>26 (1.9%)</b>                  |
| <i>seh</i>                             | Virulence gene                            | 1241                                                 | 134             | 0             | 2             | 2             | 0             | 0             | 4 (0.3%)                          |
| <i>sei</i>                             | Virulence gene                            | 596                                                  | 741             | 0             | 3             | 33            | 0             | 6             | <b>36 (2.6%)</b>                  |
| <i>sej</i>                             | Virulence gene                            | 1310                                                 | 69              | 0             | 0             | 0             | 0             | 0             | 0 (0.0%)                          |
| <i>selr</i>                            | Virulence gene                            | 1312                                                 | 67              | 0             | 0             | 0             | 0             | 0             | 0 (0.0%)                          |
| <i>sep</i>                             | Virulence gene                            | 1268                                                 | 108             | 0             | 0             | 2             | 0             | 1             | 3 (0.2%)                          |
| <i>seu</i>                             | Virulence gene                            | 595                                                  | 725             | 0             | 2             | 57            | 0             | 0             | <b>59 (4.3%)</b>                  |
| <i>tsst1</i>                           | Virulence gene                            | 1119                                                 | 255             | 0             | 1             | 4             | 0             | 0             | 5 (0.4%)                          |
| <i>ccrA</i>                            | ccr                                       | 1009                                                 | 365             | 0             | 2             | 3             | 0             | 0             | 5 (0.4%)                          |
| <i>ccrB</i>                            | ccr                                       | 1010                                                 | 336             | 9             | 1             | 22            | 0             | 1             | <b>23 (1.7%)</b>                  |
| <i>ccrC(a)</i>                         | ccr                                       | 1338                                                 | 23              | 0             | 8             | 1             | 0             | 9             | 9 (0.7%)                          |
| <i>ccrC(b)</i>                         | ccr                                       | 1333                                                 | 2               | 0             | 22            | 0             | 0             | 22            | <b>44 (3.2%)</b>                  |
| <i>ccrC(c)</i>                         | ccr                                       | 1338                                                 | 18              | 0             | 16            | 1             | 0             | 6             | <b>23 (1.7%)</b>                  |
| <b>Total (% of 114457 predictions)</b> |                                           | 102780<br>(89.8%)                                    | 11050<br>(9.7%) | 17<br>(0.01%) | 179<br>(0.2%) | 263<br>(0.2%) | 4<br>(<0.01%) | 164<br>(0.1%) | 627<br>(0.5%)                     |

2

3 \* for chromosomal mutations, "A" means no resistance-conferring mutations in Table 2 were identified. "P" means one or more were

4 identified. Identical mutations were identified by all three. In all other cases, "P" means the gene was detected and "A" means it was absent.

5 \*\* *gyrA/grlA* mutational pattern combined for analysis since both relate to ciprofloxacin resistance

6

7

8 **Supplementary Table 2: Method agreement or disagreement according to sample set and type of determinant**

| Set                  | Type of determinant           | Disagreement between the<br>three methods | Agreement between all<br>three methods | Total         |
|----------------------|-------------------------------|-------------------------------------------|----------------------------------------|---------------|
| PHE                  | Resistance gene               | 161 (0.9%)                                | 17,871 (99.1%)                         | 18,032 (100%) |
|                      | Mutations in resistance genes | 3 (0.2%)                                  | 1,565 (99.8%)                          | 1,568 (100%)  |
|                      | CCR                           | 83 (4.2%)                                 | 1,877 (95.8%)                          | 1,960 (100%)  |
|                      | Virulence factors             | 102 (0.9%)                                | 10,874 (99.1%)                         | 10,976 (100%) |
|                      | <b>Total</b>                  | 349 (1.1%)                                | 32,187 (98.9%)                         | 32,536 (100%) |
| Oxford<br>validation | Resistance gene               | 19 (0.1%)                                 | 22,337 (99.9%)                         | 22,356 (100%) |
|                      | Mutations in resistance genes | 1 (<0.1%)                                 | 1,943 (>99.9%)                         | 1,944 (100%)  |
|                      | CCR                           | 10 (0.4%)                                 | 2,420 (99.6%)                          | 2,430 (100%)  |
|                      | Virulence factors             | 15 (0.1%)                                 | 13,593 (99.6%)                         | 13,608 (100%) |
|                      | <b>Total</b>                  | 45 (0.1%)                                 | 40,293 (99.9%)                         | 40,338 (100%) |
| Oxford<br>derivation | Resistance gene               | 41 (0.2%)                                 | 23,005 (99.8%)                         | 23,046 (100%) |
|                      | Mutations in resistance genes | 4 (0.2%)                                  | 2,000 (99.8%)                          | 2,004 (100%)  |

|              |                               |            |                 |                |
|--------------|-------------------------------|------------|-----------------|----------------|
|              | CCR                           | 30 (1.2%)  | 2,475 (98.8%)   | 2,505 (100%)   |
|              | Virulence factors             | 158 (1.1%) | 13,870 (98.9%)  | 14,028 (100%)  |
|              | <b>Total</b>                  | 233 (0.6%) | 41,350 (99.4%)  | 41,583 (100%)  |
| <b>Total</b> |                               | 627 (0.5%) | 113,830 (99.5%) | 114,457 (100%) |
| All          | Resistance gene               | 221 (0.3%) | 63,213 (99.7%)  | 63,434 (100%)  |
|              | Mutations in resistance genes | 8 (0.1%)   | 5,508 (99.9%)   | 5,516 (100%)   |
|              | CCR                           | 123 (1.8%) | 6,772 (98.2%)   | 6,895 (100%)   |
|              | Virulence factors             | 275 (0.7%) | 38,337 (99.3%)  | 38,612 (100%)  |

9

10

11

12 **Supplementary Table 3: Sensitivity and specificity of antimicrobial resistance predictions using each method in each dataset**

| Set               | Method     | Sensitivity           | Specificity          |
|-------------------|------------|-----------------------|----------------------|
| Oxford validation | Genefinder | 0.977 (0.966-0.985)   | 0.997 (0.994-0.998)  |
|                   | Mykrobe    | 0.978 (0.967-0.986)   | 0.994 (0.991-0.996)  |
|                   | Typewriter | 0.975 (0.963 -0.984)  | 0.998 (0.995 -0.999) |
| Oxford derivation | Genefinder | 0.973 (0.958-0.983)   | 0.991 (0.988-0.994)  |
|                   | Mykrobe    | 0.973 (0.958 – 0.983) | 0.991 (0.987-0.994)  |
|                   | Typewriter | 0.970 (0.955-0.981)   | 0.992 (0.988-0.994)  |
| Colindale         | Genefinder | 0.954 (0.940-0.965)   | 0.981 (0.976-0.986)  |
|                   | Mykrobe    | 0.954 (0.955-0.981)   | 0.979 (0.974-0.984)  |
|                   | Typewriter | 0.949 (0.935-0.961)   | 0.984 (0.979-0.988)  |

13

14

15 **Supplementary Table 4: Chromosomal mutations**

| <b>Gene</b> | <b>Antibiotic</b> | <b>Present in at least one WGS<br/>within this study and<br/>resistance-determinant</b> | <b>Present in at least one WGS<br/>within this study, but not a<br/>resistance-determinant</b>                  |
|-------------|-------------------|-----------------------------------------------------------------------------------------|-----------------------------------------------------------------------------------------------------------------|
| <i>dfrB</i> | Trimethoprim      | H150R, L21V*, H31N, L41F,<br>F99S, F99Y,                                                | F99X                                                                                                            |
| <i>fusA</i> | Fusidic acid      | A67T*, V90I, P404Q, P404L,<br>P406L, G452S, H457Y, H457Q,<br>L461K, L461S,              | A71X; A160X, P161X; T326I,<br>D373G, D373X, A376T, P404?,<br>P406?, L456X, L461X, L461F,<br>E468V, C473X, T656S |
| <i>gyrA</i> | Ciprofloxacin     | S84L, S84A                                                                              | S84V, S84X, E88X                                                                                                |
| <i>grlA</i> | Ciprofloxacin     | I45M*, S80F, S80Y, E84G*,<br>E84K*                                                      |                                                                                                                 |
| <i>rpoB</i> | Rifampicin        | S464P, Q468R, D471Y, A477D,                                                             |                                                                                                                 |



H481N, H481Y

16

17 \* mutation only used to predict resistance if occurred in combination with other mutations, see Gordon NC, Price JR, Cole K, Everitt R, Morgan  
18 M, Finney J, Kearns AM, Pichon B, Young B, Wilson DJ, Llewelyn MJ, Paul J, Peto TE, Crook DW, Walker AS, Golubchik T. 2014. Prediction of  
19 *Staphylococcus aureus* antimicrobial resistance by whole-genome sequencing. J Clin Microbiol 52:1182-9 Supplementary Table S1 for details of  
20 combinations. Note: only including resistance-conferring mutations from Gordon *et al* that were observed in one or more study isolates. "X"  
21 means no call made at this position.
