# Supplementary material
Source: PubMed Central journal article supplement (PMC6113501)
Supplement: zjm999096064s2.pdf [file zjm999096064s2.pdf]

- 1 Supplementary Figure 1 Virulence gene predictions compared to PCR
- 2
- 3 Supplementary Figure 2 Sensitivity and specificity of genotypic predictions of PCR-
- 4 determined virulence and other genes
- 5

5

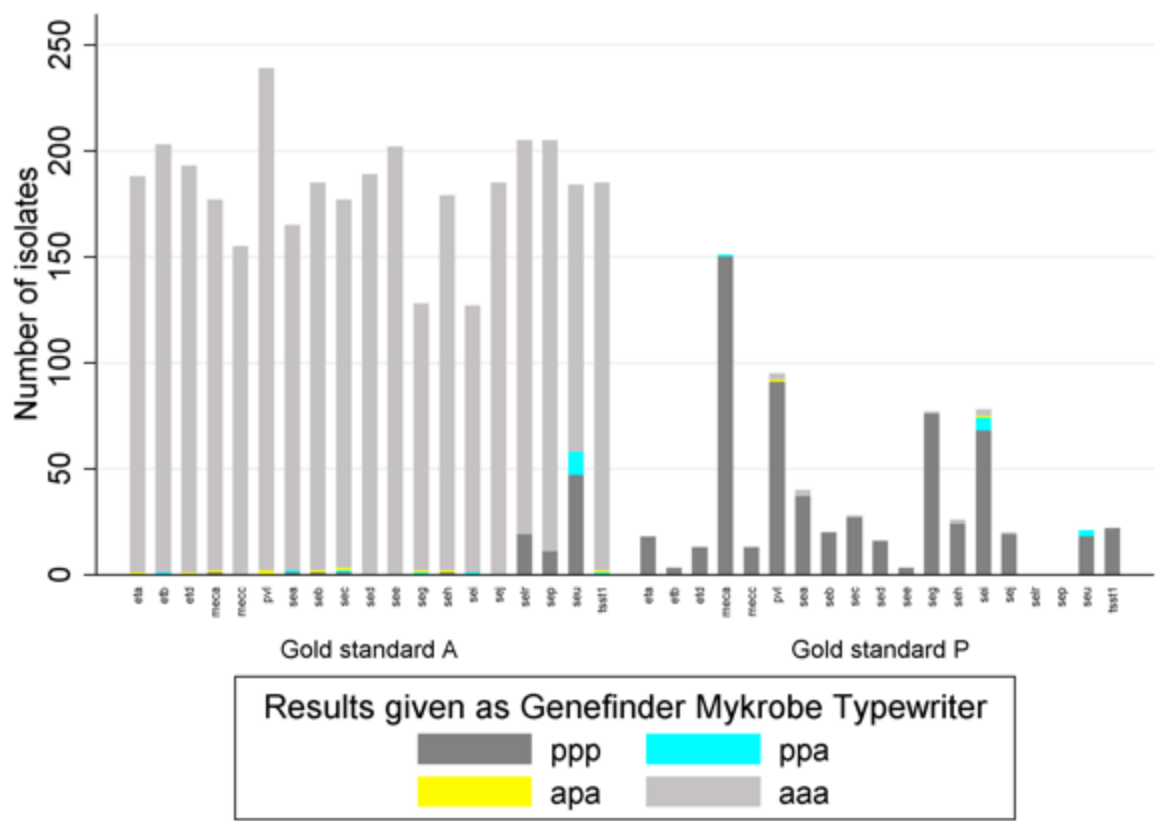

6

7

7

8 **Supplementary Figure 2 Sensitivity and specificity of genotypic predictions of PCR-**  
9 **determined virulence and other genes**

10 (a) Sensitivity

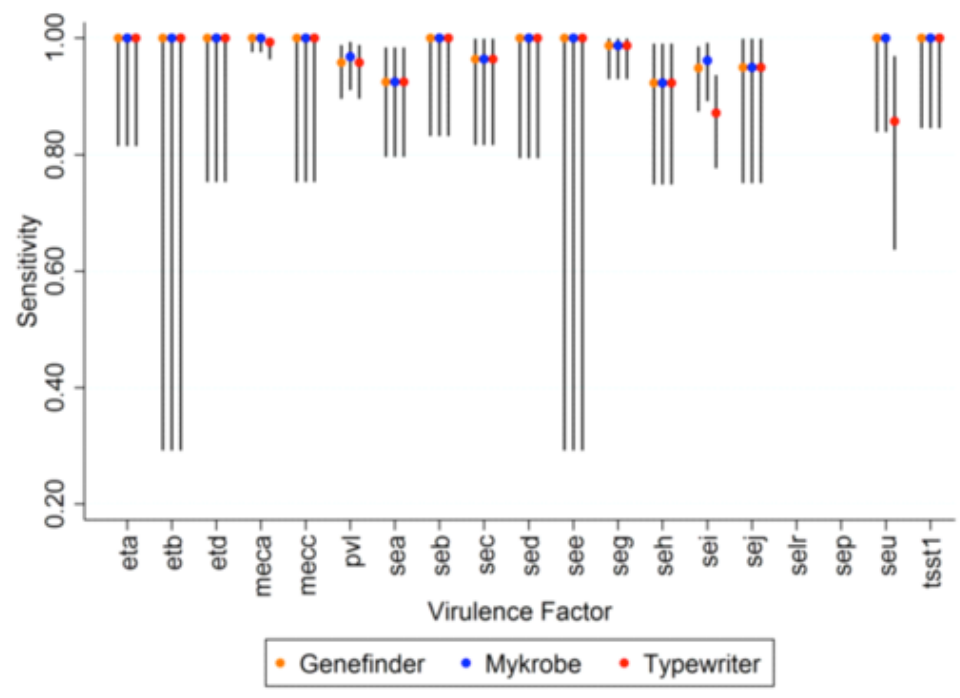

11

12

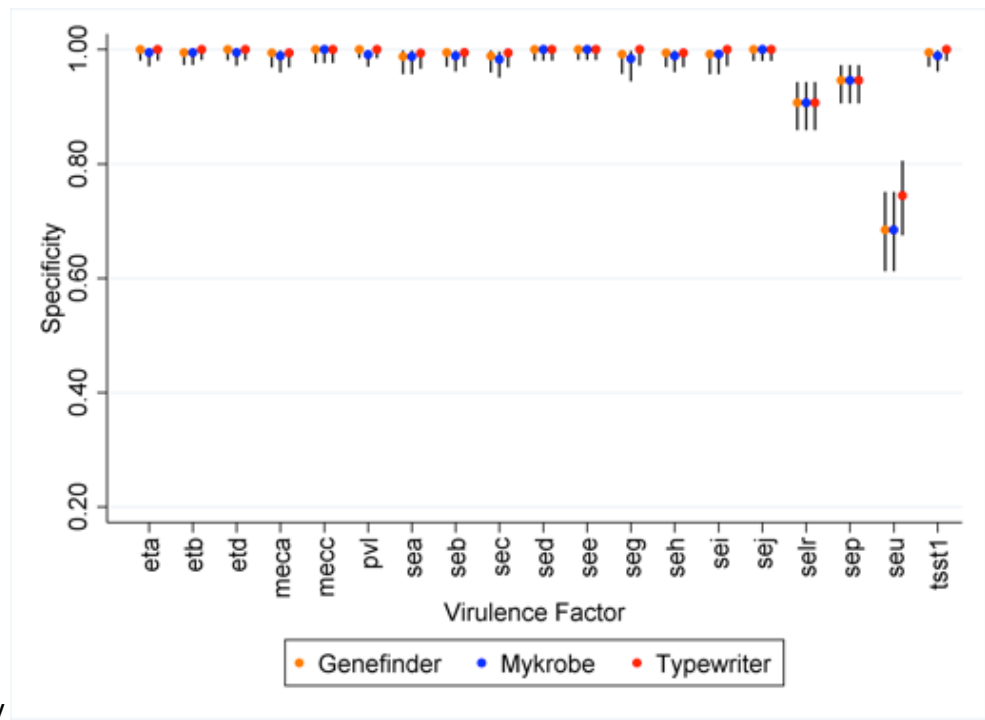

13 (b) specificity
